# Supplementary material
Source: PubMed Central journal article supplement (PMC2629248)
Supplement: 0806823106_0806823106SI.pdf [file 0806823106_0806823106SI.pdf]

# Supporting Information

Berlow *et al.* 10.1073/pnas.0806823106

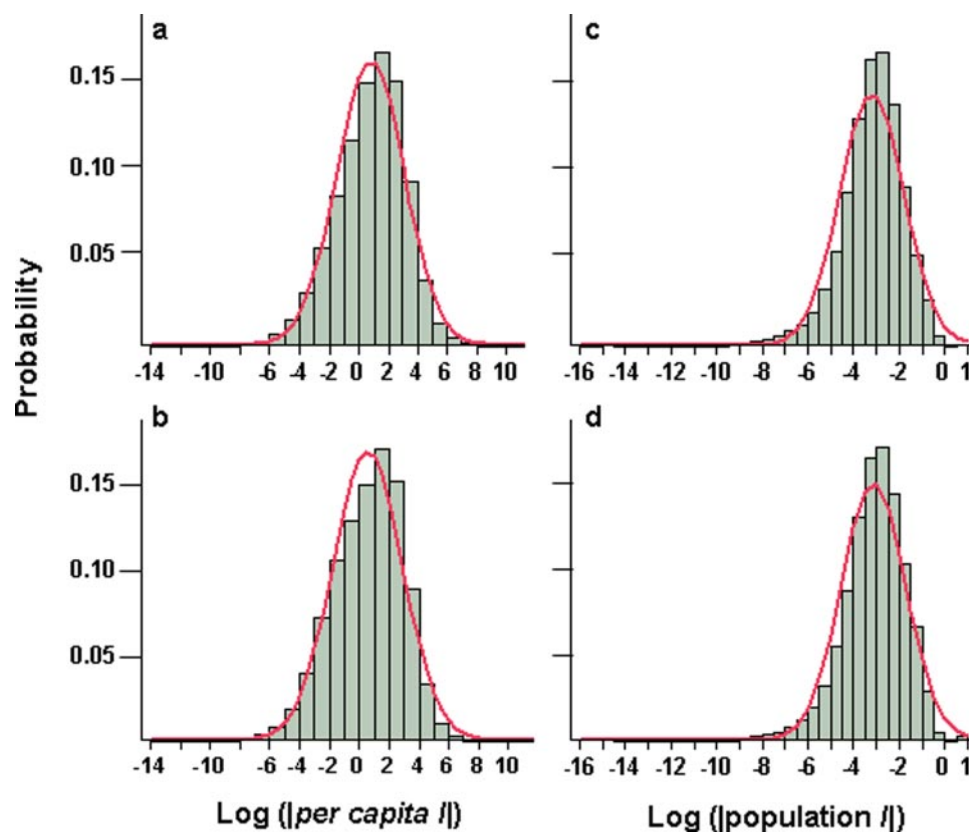

**Fig. S1.** Emergent variation in interaction strengths. (a-b) The distribution of  $\log_{10}$  ( per capita  $I$ ) for (a) positive and (b) negative interactions. (c-d) The distribution of  $\log_{10}$  ( population  $I$ ) for (c) positive and (d) negative interactions.  $n = 114,114$  positive interactions for a and c,  $n = 139,918$  negative interactions for b and d. The red line is a fitted normal distribution.

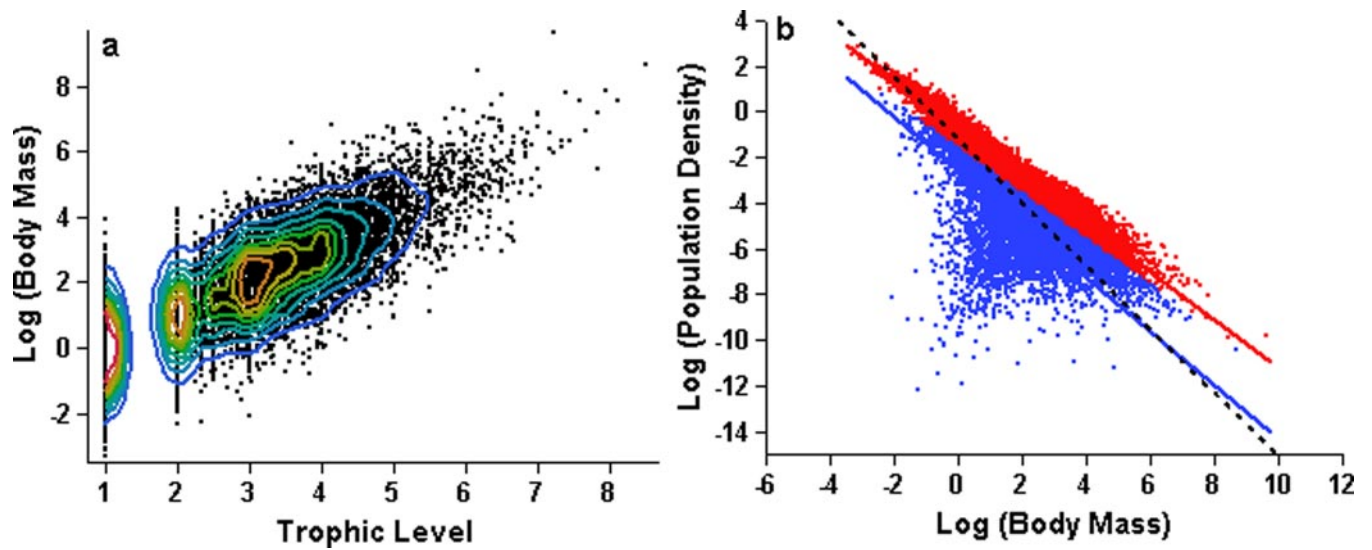

**Fig. S2.** Macroecological assumptions and emergent patterns. (a)  $\text{Log}_{10}$  body mass depending on trophic level across all food webs simulated. Contour lines are 10% density quantiles from blue (low) to red (high). (b) Emergent relationship between species mean density and mean body mass for all species. Different colors indicate upper (red) and lower (blue) 50% quantiles of mean  $B_R$ . RMA Regressions of  $\text{log}_{10}$  density vs.  $\text{log}_{10}$  body mass for each biomass quantile (from low (blue line) to high (red line)): slope =  $-1.17$ ,  $-1.05$ ,  $R^2 = 0.36$ ,  $0.96$ ; error,  $n = 6,058$  species for each quantile. The overall relationship (dotted black line) has a slope of  $-1.38$  ( $R^2 = 0.59$ ).

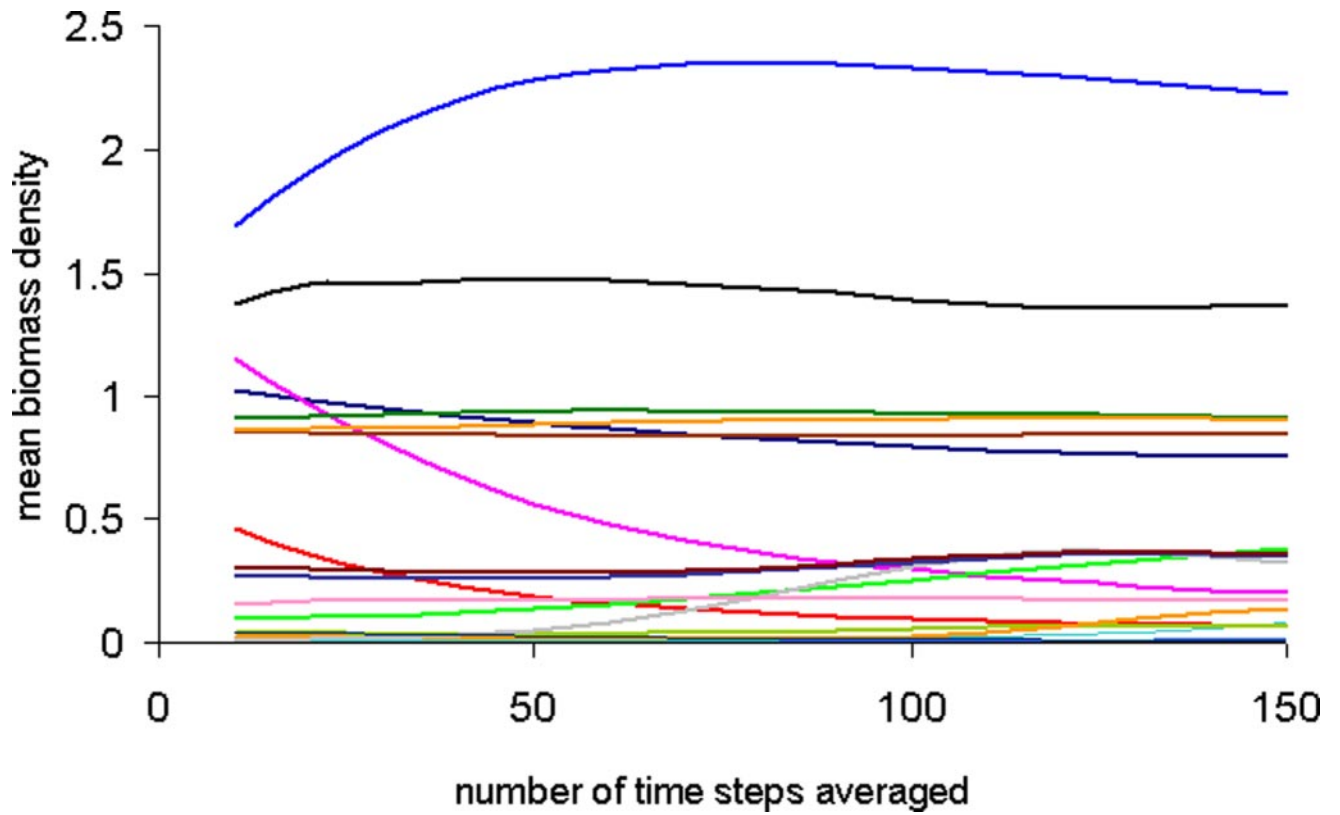

Fig. S3. Determining the time averaging window in an example 30 species niche-model food web. Mean biomass densities depending on the number of time steps averaged (starting after time step 50). Colors indicate different species

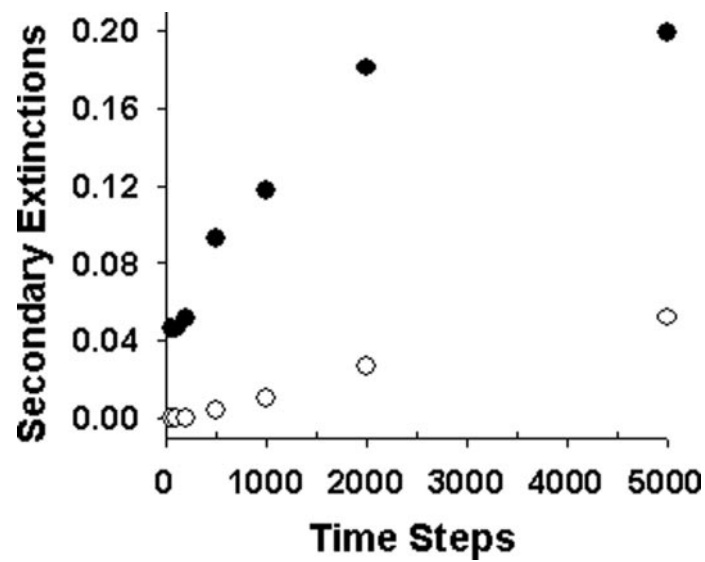

**Fig. S4.** Secondary extinctions over time. The proportion interactions where *R* removal caused secondary extinction of *T* for simulations of different length. Extinction thresholds were defined by either final *T* biomasses (solid symbols) or time-averaged *T* biomass (open symbols). One hundred different webs were used for each time series length. Cases where *R* or *T* did not persist in runs with *R* unmanipulated were excluded from the analysis.

**Table S1. Explaining variation in  $\log(I/I)$  for different simulation lengths**

| time steps | 2° extinctions | $n$   | $R^2$ | Intercept | $B_T^+$ | $B_R$ |
|------------|----------------|-------|-------|-----------|---------|-------|
| 50         | included       | 40868 | 0.48  | −1.20     | 0.68    | 0.20  |
| 50         | excluded       | 38979 | 0.50  | −1.19     | 0.69    | 0.21  |
| 100        | included       | 42910 | 0.58  | −1.30     | 0.71    | 0.21  |
| 100        | excluded       | 40940 | 0.59  | −1.27     | 0.72    | 0.21  |
| 200        | included       | 43390 | 0.68  | −1.33     | 0.73    | 0.20  |
| 200        | excluded       | 41160 | 0.69  | −1.29     | 0.73    | 0.20  |
| 500        | included       | 37202 | 0.75  | −1.42     | 0.72    | 0.23  |
| 500        | excluded       | 33659 | 0.76  | −1.38     | 0.73    | 0.22  |
| 1000       | included       | 36462 | 0.74  | −1.44     | 0.71    | 0.28  |
| 1000       | excluded       | 31950 | 0.75  | −1.42     | 0.71    | 0.27  |
| 2000       | included       | 25181 | 0.75  | −1.32     | 0.70    | 0.35  |
| 2000       | excluded       | 20218 | 0.76  | −1.33     | 0.70    | 0.34  |
| 5000       | included       | 19242 | 0.68  | −1.20     | 0.65    | 0.46  |
| 5000       | excluded       | 14689 | 0.67  | −1.22     | 0.63    | 0.46  |

Multiple linear regression results predicting  $\log(I/I)$  using  $\log(B_T^+)$  and  $\log(B_R)$  for different simulation lengths and with secondary extinctions included or excluded from the analysis.  $P < 0.0001$  in all cases.  $n$  = number of interactions.  $B_T^+$  and  $B_R$  are the biomass of  $T$  with  $R$  present and the biomass of  $R$ , respectively

## Other Supporting Information Files

[SI Appendix](#)
